# Supplementary material for: MV1035 Overcomes Temozolomide Resistance in Patient-Derived Glioblastoma Stem Cell Lines
Source: MDPI journal article supplement (doi:10.3390/biology11010070), 2022-01-04

**MV1035 OVERCOMES TEMOZOLOMIDE RESISTANCE IN PATIENT-DERIVED GLIOBLASTOMA STEM CELL LINES**

**Figure 3**

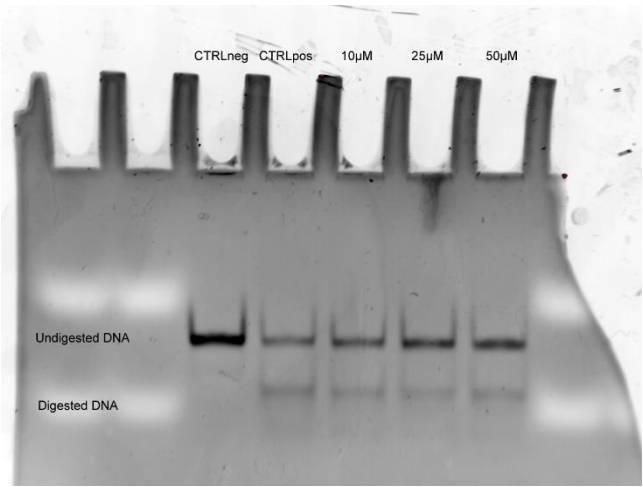

**Figure 6**

MGMT western blot

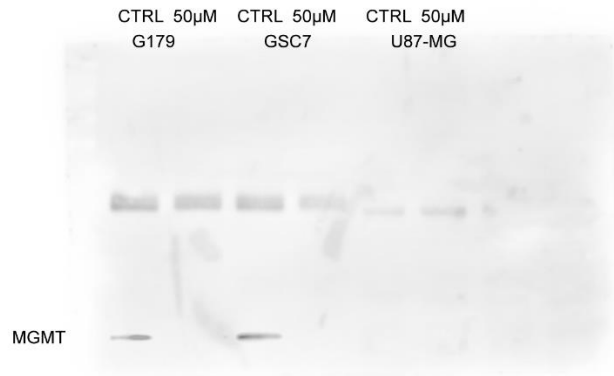

Actin western blot

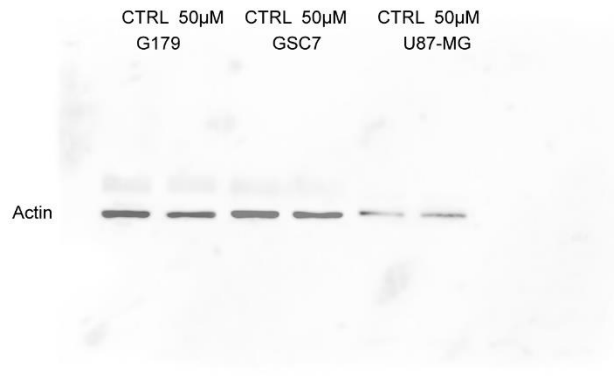

Supplement: s1 [file s1]
